# Supplementary material for: Transmission dynamics of COVID-19 in household and community settings in the United Kingdom, January to March 2020
Source: PubMed Central journal article supplement (PMC9012093; doi:10.2807/1560-7917.es.2022.27.15.2001551), 2022-04-14
Supplement: 20-01551_BERNAL_Supplement1_Questionnaire1.pdf [file 20-01551_BERNAL_Supplement1_Questionnaire1.pdf]

## Supplement 1

This supplementary material is hosted by *Eurosurveillance* as supporting information alongside the article [Transmission dynamics of COVID-19 in household and community settings in the United Kingdom, January to March 2020] on behalf of the authors who remain responsible for the accuracy and appropriateness of the content. The same standards for ethics, copyright, attributions and permissions as for the article apply. Supplements are not edited by *Eurosurveillance* and the journal is not responsible for the maintenance of any links or email addresses provided therein.

Initial Contact Report Form - 2a  
v9- COVID-19

| For reference only                                                                                                                                                                           |                         |                                                   |                |                                                             |
|----------------------------------------------------------------------------------------------------------------------------------------------------------------------------------------------|-------------------------|---------------------------------------------------|----------------|-------------------------------------------------------------|
| Confirmed case number (issued by National i.e. NISHPZone)                                                                                                                                    |                         | Local ID of contact (local HPZone ID for contact) |                | FF100 id number (automatically generated on FF100 web tool) |
| Name of confirmed case (lab confirmed case that this person is a contact of)                                                                                                                 |                         |                                                   |                |                                                             |
| <b>*Mandatory fields in pink with bold text and an asterisk</b>                                                                                                                              |                         |                                                   |                |                                                             |
| 1. Reporter Details                                                                                                                                                                          |                         |                                                   |                |                                                             |
| *Name of the reporter (person completing the form)                                                                                                                                           |                         |                                                   |                |                                                             |
| *Date Reported                                                                                                                                                                               |                         |                                                   |                |                                                             |
| Position                                                                                                                                                                                     |                         |                                                   |                |                                                             |
| Organisation                                                                                                                                                                                 |                         |                                                   |                |                                                             |
| Phone and extension                                                                                                                                                                          |                         |                                                   |                |                                                             |
| Mobile                                                                                                                                                                                       |                         |                                                   |                |                                                             |
| Email                                                                                                                                                                                        |                         |                                                   |                |                                                             |
| Fax                                                                                                                                                                                          |                         |                                                   |                |                                                             |
| *Date of interview with informant                                                                                                                                                            |                         |                                                   |                |                                                             |
| 2. Informant Details                                                                                                                                                                         |                         |                                                   |                |                                                             |
| Informant (Please mark x)                                                                                                                                                                    | Contact                 |                                                   | Other          |                                                             |
| If Other:                                                                                                                                                                                    |                         |                                                   |                |                                                             |
| Contact details including telephone number                                                                                                                                                   |                         |                                                   |                |                                                             |
| Relationship with contact                                                                                                                                                                    |                         |                                                   |                |                                                             |
| 3. Details of the Contact                                                                                                                                                                    |                         |                                                   |                |                                                             |
| NHS number                                                                                                                                                                                   |                         |                                                   |                |                                                             |
| *Forename                                                                                                                                                                                    |                         |                                                   |                |                                                             |
| *Surname                                                                                                                                                                                     |                         |                                                   |                |                                                             |
| Sex                                                                                                                                                                                          | Male                    | Female                                            | Not Specified  |                                                             |
| Date of Birth                                                                                                                                                                                |                         |                                                   | Age            |                                                             |
| Local ID Number (HPZone number)                                                                                                                                                              |                         |                                                   |                |                                                             |
| Street Address                                                                                                                                                                               |                         |                                                   | Home Telephone |                                                             |
| Town                                                                                                                                                                                         |                         |                                                   | Work Telephone |                                                             |
| County                                                                                                                                                                                       |                         |                                                   | Mobile         |                                                             |
| Post Code                                                                                                                                                                                    |                         |                                                   | Email address  |                                                             |
| Preferred mode of contact                                                                                                                                                                    |                         |                                                   |                |                                                             |
| Country of Residence                                                                                                                                                                         |                         |                                                   | Nationality    |                                                             |
| Country of Birth                                                                                                                                                                             |                         |                                                   |                |                                                             |
| *Responsible PHE Centre                                                                                                                                                                      |                         |                                                   |                |                                                             |
| Local Authority                                                                                                                                                                              |                         |                                                   |                |                                                             |
| Name of school if appropriate                                                                                                                                                                |                         |                                                   |                |                                                             |
| *Location of contact with confirmed case                                                                                                                                                     | Household               | Health care setting                               | School         | Aircraft                                                    |
|                                                                                                                                                                                              |                         |                                                   |                |                                                             |
|                                                                                                                                                                                              | Other, please specify   |                                                   |                |                                                             |
| *Date of last contact with confirmed case (i.e. date of exposure (protected or unprotected) if still in contact please put today's date). This date MUST be included for the daily follow up |                         |                                                   |                |                                                             |
| Is the case part of an institutional outbreak?                                                                                                                                               | Yes                     | No                                                | Unknown        |                                                             |
|                                                                                                                                                                                              |                         |                                                   |                |                                                             |
|                                                                                                                                                                                              | If yes, please specify: |                                                   |                |                                                             |

Initial Contact Report Form - 2a  
v9- COVID-19

|                                                                                    |                                                |                          |                |            |
|------------------------------------------------------------------------------------|------------------------------------------------|--------------------------|----------------|------------|
| Occupation                                                                         |                                                |                          |                |            |
| *Healthcare Worker (HCW) working with confirmed case                               | Yes                                            | No                       |                |            |
|                                                                                    |                                                |                          |                |            |
|                                                                                    | If Yes HCW, please complete Sections 4,5 and 6 |                          |                |            |
| If Not HCW, please complete Sections 4,5 and 7                                     |                                                |                          |                |            |
| <b>4. Symptoms in this contact</b>                                                 |                                                |                          |                |            |
| *Has the contact been ill within the 14 days after exposure to the confirmed case? | Yes                                            | No                       |                |            |
|                                                                                    |                                                |                          |                |            |
| *Is the contact currently ill?                                                     | Yes                                            | No                       |                |            |
|                                                                                    |                                                |                          |                |            |
| If contact has not been ill please go to Section 5.                                |                                                |                          |                |            |
| Date of first symptom onset                                                        |                                                | Unknown (x)              |                |            |
| Maximum temperature                                                                |                                                |                          |                |            |
| <b>Respiratory symptoms</b>                                                        |                                                |                          |                |            |
| Fever or history of Fever ( $\geq 38^{\circ}\text{C}$ )                            | Yes                                            | If yes, first onset date | No             | Unknown    |
|                                                                                    |                                                |                          |                |            |
| Runny nose                                                                         | Yes                                            | If yes, first onset date | No             | Unknown    |
|                                                                                    |                                                |                          |                |            |
| Sneezing                                                                           | Yes                                            | If yes, first onset date | No             | Unknown    |
|                                                                                    |                                                |                          |                |            |
| Cough                                                                              | Yes                                            | If yes, first onset date | No             | Unknown    |
|                                                                                    |                                                |                          |                |            |
|                                                                                    | If yes, dry or productive?                     |                          | Dry            | Productive |
|                                                                                    |                                                |                          |                |            |
| Shortness of breath                                                                | Yes                                            | If yes, first onset date | No             | Unknown    |
|                                                                                    |                                                |                          |                |            |
| Sore throat                                                                        | Yes                                            | If yes, first onset date | No             | Unknown    |
|                                                                                    |                                                |                          |                |            |
| <b>Other symptoms</b>                                                              |                                                |                          |                |            |
| Diarrhoea                                                                          | Yes                                            | No                       | Unknown        |            |
|                                                                                    |                                                |                          |                |            |
| Nausea                                                                             | Yes                                            | No                       | Unknown        |            |
|                                                                                    |                                                |                          |                |            |
| Vomiting                                                                           | Yes                                            | No                       | Unknown        |            |
|                                                                                    |                                                |                          |                |            |
| Fatigue                                                                            | Yes                                            | No                       | Unknown        |            |
|                                                                                    |                                                |                          |                |            |
| Muscle ache                                                                        | Yes                                            | No                       | Unknown        |            |
|                                                                                    |                                                |                          |                |            |
| Joint ache                                                                         | Yes                                            | No                       | Unknown        |            |
|                                                                                    |                                                |                          |                |            |
| Loss of appetite                                                                   | Yes                                            | No                       | Unknown        |            |
|                                                                                    |                                                |                          |                |            |
| Headache                                                                           | Yes                                            | No                       | Unknown        |            |
|                                                                                    |                                                |                          |                |            |
| Seizures                                                                           | Yes                                            | No                       | Unknown        |            |
|                                                                                    |                                                |                          |                |            |
| Altered Consciousness                                                              | Yes                                            | No                       | Unknown        |            |
|                                                                                    |                                                |                          |                |            |
| Nose bleed                                                                         | Yes                                            | No                       | Unknown        |            |
|                                                                                    |                                                |                          |                |            |
| Rash                                                                               | Yes                                            | No                       | Unknown        |            |
|                                                                                    |                                                |                          |                |            |
| Other                                                                              | Yes                                            | No                       | Please specify |            |
|                                                                                    |                                                |                          |                |            |

Initial Contact Report Form - 2a  
v9- COVID-19

5. Medical History

Does the contact have any underlying medical conditions? Complete where appropriate

This information is collected to understand whether specific groups are at greater risk of infection with this virus, to inform future health advice and precautions.

|                                                                    | Yes                             | No    | Unknown | Details |       |
|--------------------------------------------------------------------|---------------------------------|-------|---------|---------|-------|
| Chronic heart disease                                              |                                 |       |         |         |       |
| Diabetes                                                           |                                 |       |         |         |       |
| HIV/other immunodeficiency                                         |                                 |       |         |         |       |
| Chronic kidney disease                                             |                                 |       |         |         |       |
| Chronic liver disease                                              |                                 |       |         |         |       |
| Chronic respiratory disease, excluding asthma requiring medication |                                 |       |         |         |       |
| Asthma requiring medication                                        |                                 |       |         |         |       |
| Malignancy                                                         |                                 |       |         |         |       |
| Organ or bone marrow recipient                                     |                                 |       |         |         |       |
| Seizure disorder                                                   |                                 |       |         |         |       |
| Chronic neurological disease                                       |                                 |       |         |         |       |
| Currently pregnant                                                 | Yes                             | No    | Unknown |         |       |
|                                                                    | If yes, trimester               | First | Second  |         | Third |
|                                                                    |                                 |       |         |         |       |
|                                                                    | If yes, estimated delivery date |       |         |         |       |
| Height in cm                                                       |                                 |       |         |         |       |
| Weight in kg                                                       |                                 |       |         |         |       |
| Other, please specify                                              |                                 |       |         |         |       |

Initial Contact Report Form - 2a  
v9- COVID-19

| 6. Exposure in a healthcare setting                                                          |                                   |                       |                      |                           |       |
|----------------------------------------------------------------------------------------------|-----------------------------------|-----------------------|----------------------|---------------------------|-------|
| Was any contact with the confirmed case unprotected (without full PPE)?                      | Yes                               | No                    |                      |                           |       |
|                                                                                              |                                   |                       |                      |                           |       |
|                                                                                              | First date of unprotected contact |                       |                      |                           |       |
| Last date of unprotected contact                                                             |                                   |                       |                      |                           |       |
| Was any contact with the confirmed case protected (full PPE)?                                | Yes                               | No                    |                      |                           |       |
|                                                                                              |                                   |                       |                      |                           |       |
|                                                                                              | First date of protected contact   |                       |                      |                           |       |
| Last date of protected contact                                                               |                                   |                       |                      |                           |       |
| Job title                                                                                    |                                   |                       |                      |                           |       |
| Place of work                                                                                |                                   |                       |                      |                           |       |
| Direct patient contact?<br>(eg Hands-on clinical contact)                                    | Yes                               | No                    |                      |                           |       |
|                                                                                              |                                   |                       |                      |                           |       |
| What type of protective equipment was used during contact with confirmed case and how often? |                                   |                       |                      |                           |       |
| Surgical mask                                                                                | Yes                               | No                    | Don't know           |                           |       |
|                                                                                              |                                   |                       |                      |                           |       |
|                                                                                              | If yes, how often                 | Always (100% of time) | Often (>50% of time) | Infrequent (<50% of time) | Never |
| High filtration mask (FFP3)                                                                  | Yes                               | No                    | Don't know           |                           |       |
|                                                                                              |                                   |                       |                      |                           |       |
|                                                                                              | If yes, how often                 | Always (100% of time) | Often (>50% of time) | Infrequent (<50% of time) | Never |
| Eye protection                                                                               | Yes                               | No                    | Don't know           |                           |       |
|                                                                                              |                                   |                       |                      |                           |       |
|                                                                                              | If yes, how often                 | Always (100% of time) | Often (>50% of time) | Infrequent (<50% of time) | Never |
| Gloves                                                                                       | Yes                               | No                    | Don't know           |                           |       |
|                                                                                              |                                   |                       |                      |                           |       |
|                                                                                              | If yes, how often                 | Always (100% of time) | Often (>50% of time) | Infrequent (<50% of time) | Never |
| Gown                                                                                         | Yes                               | No                    | Don't know           |                           |       |
|                                                                                              |                                   |                       |                      |                           |       |
|                                                                                              | If yes, how often                 | Always (100% of time) | Often (>50% of time) | Infrequent (<50% of time) | Never |
| Was the contact present while any aerosol generating procedures took place?                  | Yes                               | No                    |                      |                           |       |
|                                                                                              |                                   |                       |                      |                           |       |
| If yes, what procedure were they present at?<br>List and date if more than one               | Procedure 1                       |                       |                      | Date                      |       |
|                                                                                              | Procedure 2                       |                       |                      | Date                      |       |
|                                                                                              | Procedure 3                       |                       |                      | Date                      |       |
| Was the contact wearing any type of mask at this/these procedure?                            |                                   | Surgical              | FFP3                 | None                      |       |
|                                                                                              | Procedure 1                       |                       |                      |                           |       |
|                                                                                              | Procedure 2                       |                       |                      |                           |       |
|                                                                                              | Procedure 3                       |                       |                      |                           |       |
| Date of illness onset for confirmed case (if known)                                          |                                   |                       |                      |                           |       |

Initial Contact Report Form - 2a  
v9- COVID-19

|                                                                                                                                                                                                                                                                                                                                                                      |        |    |         |    |    |
|----------------------------------------------------------------------------------------------------------------------------------------------------------------------------------------------------------------------------------------------------------------------------------------------------------------------------------------------------------------------|--------|----|---------|----|----|
| <p>If date of onset in confirmed case is known:<br/>Please mark with x below all days of contact with the confirmed case since onset of illness in the confirmed case.<br/>E.g. 0 means contact on the day of onset of illness. +1 means contact the day after onset of illness<br/>If date of onset in confirmed case is not known please skip to next question</p> |        |    |         |    |    |
| Day                                                                                                                                                                                                                                                                                                                                                                  | 0      | 1  | 2       | 3  | 4  |
| Date (autocompletes from question above)                                                                                                                                                                                                                                                                                                                             |        |    |         |    |    |
| Enter x for contact occurred on this day                                                                                                                                                                                                                                                                                                                             |        |    |         |    |    |
| Day                                                                                                                                                                                                                                                                                                                                                                  | 5      | 6  | 7       | 8  | 9  |
| Date                                                                                                                                                                                                                                                                                                                                                                 |        |    |         |    |    |
| Enter x for contact occurred on this day                                                                                                                                                                                                                                                                                                                             |        |    |         |    |    |
| Day                                                                                                                                                                                                                                                                                                                                                                  | 10     | 11 | 12      | 13 | 14 |
| Date                                                                                                                                                                                                                                                                                                                                                                 |        |    |         |    |    |
| Enter x for contact occurred on this day                                                                                                                                                                                                                                                                                                                             |        |    |         |    |    |
| If date of onset in confirmed case is not known, please give the total number of days you were in contact with the confirmed case while they were symptomatic                                                                                                                                                                                                        |        |    |         |    |    |
| Monitoring state of contact following initial assessment                                                                                                                                                                                                                                                                                                             | Active |    | Passive |    |    |

Initial Contact Report Form - 2a  
v9- COVID-19

| 7. Exposure Information - Non Healthcare Workers                                                                                                                                                                                                                                                                                                                     |                                                                                                     |                                                                         |                                                                                   |                                                               |                        |
|----------------------------------------------------------------------------------------------------------------------------------------------------------------------------------------------------------------------------------------------------------------------------------------------------------------------------------------------------------------------|-----------------------------------------------------------------------------------------------------|-------------------------------------------------------------------------|-----------------------------------------------------------------------------------|---------------------------------------------------------------|------------------------|
| Has the contact been in continuous contact with the confirmed case? E.g. same household                                                                                                                                                                                                                                                                              | Yes                                                                                                 | No                                                                      | Unknown                                                                           |                                                               |                        |
|                                                                                                                                                                                                                                                                                                                                                                      |                                                                                                     |                                                                         |                                                                                   |                                                               |                        |
|                                                                                                                                                                                                                                                                                                                                                                      | If no, date of first contact with case                                                              |                                                                         |                                                                                   |                                                               |                        |
| Last date of contact with confirmed case                                                                                                                                                                                                                                                                                                                             |                                                                                                     |                                                                         | Contact has not ended (x)                                                         |                                                               |                        |
| Date of illness onset for confirmed case (if known)                                                                                                                                                                                                                                                                                                                  |                                                                                                     |                                                                         |                                                                                   |                                                               |                        |
| <p>If date of onset in confirmed case is known:<br/>Please mark with x below all days of contact with the confirmed case since onset of illness in the confirmed case.<br/>E.g. 0 means contact on the day of onset of illness. +1 means contact the day after onset of illness<br/>If date of onset in confirmed case is not known please skip to next question</p> |                                                                                                     |                                                                         |                                                                                   |                                                               |                        |
| Day                                                                                                                                                                                                                                                                                                                                                                  | 0                                                                                                   | 1                                                                       | 2                                                                                 | 3                                                             | 4                      |
| Date (autocompletes from question above)                                                                                                                                                                                                                                                                                                                             |                                                                                                     |                                                                         |                                                                                   |                                                               |                        |
| Enter x for contact occurred on this day                                                                                                                                                                                                                                                                                                                             |                                                                                                     |                                                                         |                                                                                   |                                                               |                        |
| Day                                                                                                                                                                                                                                                                                                                                                                  | 5                                                                                                   | 6                                                                       | 7                                                                                 | 8                                                             | 9                      |
| Date                                                                                                                                                                                                                                                                                                                                                                 |                                                                                                     |                                                                         |                                                                                   |                                                               |                        |
| Enter x for contact occurred on this day                                                                                                                                                                                                                                                                                                                             |                                                                                                     |                                                                         |                                                                                   |                                                               |                        |
| Day                                                                                                                                                                                                                                                                                                                                                                  | 10                                                                                                  | 11                                                                      | 12                                                                                | 13                                                            | 14                     |
| Date                                                                                                                                                                                                                                                                                                                                                                 |                                                                                                     |                                                                         |                                                                                   |                                                               |                        |
| Enter x for contact occurred on this day                                                                                                                                                                                                                                                                                                                             |                                                                                                     |                                                                         |                                                                                   |                                                               |                        |
| If date of onset in confirmed case is not known, please give the total number of days you were in contact with the confirmed case while they were symptomatic                                                                                                                                                                                                        |                                                                                                     |                                                                         |                                                                                   |                                                               |                        |
| Monitoring state of contact following initial assessment                                                                                                                                                                                                                                                                                                             | Active                                                                                              |                                                                         | Passive                                                                           |                                                               |                        |
| 8. Outcome/ Current Status of Contact                                                                                                                                                                                                                                                                                                                                |                                                                                                     |                                                                         |                                                                                   |                                                               |                        |
| Please complete only if has been ill since exposure or is currently ill.                                                                                                                                                                                                                                                                                             |                                                                                                     |                                                                         |                                                                                   |                                                               |                        |
| Status                                                                                                                                                                                                                                                                                                                                                               | Recovered                                                                                           | If recovered. Date symptoms resolved (able to resume normal activities) | ill                                                                               | Dead                                                          | If dead, date of death |
|                                                                                                                                                                                                                                                                                                                                                                      |                                                                                                     |                                                                         |                                                                                   |                                                               |                        |
| Was the contact hospitalised?                                                                                                                                                                                                                                                                                                                                        | Yes                                                                                                 | No                                                                      | Don't know                                                                        |                                                               |                        |
| If hospitalisation occurred:                                                                                                                                                                                                                                                                                                                                         | Is the contact still hospitalised?                                                                  | Yes                                                                     | No                                                                                | Don't know                                                    |                        |
|                                                                                                                                                                                                                                                                                                                                                                      |                                                                                                     |                                                                         |                                                                                   |                                                               |                        |
|                                                                                                                                                                                                                                                                                                                                                                      | If yes, date of admission                                                                           |                                                                         |                                                                                   |                                                               |                        |
|                                                                                                                                                                                                                                                                                                                                                                      | Date of discharge (leave blank if patient is still hospitalised)                                    |                                                                         |                                                                                   |                                                               |                        |
| Case classification of contact if appropriate (see below for definitions)                                                                                                                                                                                                                                                                                            | Confirmed                                                                                           | Presumptive positive                                                    | Possible                                                                          | Discarded                                                     | N/A                    |
|                                                                                                                                                                                                                                                                                                                                                                      |                                                                                                     |                                                                         |                                                                                   |                                                               |                        |
|                                                                                                                                                                                                                                                                                                                                                                      | PHE National Reference Laboratory (RVU) Colindale positive confirmation of infection with novel-CoV | PHE novel-CoV Testing Laboratory positive of infection with novel-CoV   | Acute respiratory infection or more severe illness as per possible case algorithm | Any possible case with a negative novel CoV laboratory result | Not applicable         |

Initial Contact Report Form - 2a  
v9- COVID-19

9. Virological Tests (if appropriate)

| Specimen Date | Laboratory Test Date | Specimen Type <sup>3</sup> | Lab Name <sup>4</sup> | Local Lab Number | Virus | Type of Test <sup>5</sup> | Result |
|---------------|----------------------|----------------------------|-----------------------|------------------|-------|---------------------------|--------|
|               |                      |                            |                       |                  |       |                           |        |
|               |                      |                            |                       |                  |       |                           |        |
|               |                      |                            |                       |                  |       |                           |        |
|               |                      |                            |                       |                  |       |                           |        |

[3] Specimen Types: BAL, Blood-Plasma, Blood-Serum, Faeces, Nose/Throat swab, NPA, Sputum, Tissue, Oral fluid, Finger prick, Urine, Endotracheal aspirate

[4] Lab Names: Belfast, Birmingham, Bristol, Cambridge, Cardiff, Dublin, Glasgow, Leeds, Leicester, Liverpool, London-Barts, London-Kings, London-St Thomas's, London-UCLH, Manchester, Newcastle, Nottingham, PHE-RVU, Porton, Southampton, Other (please specify)

[5] Test Types: RT-PCR, Sequencing, Pyrosequencing, Antigenic-typing, Phenotypic antiviral susceptibility testing, HA/MN

10. Serology

|                                              |     |    |          |
|----------------------------------------------|-----|----|----------|
| Has baseline serology been taken on contact? | Yes | No | Not sure |
|                                              |     |    |          |
| If yes, date serology taken?                 |     |    |          |
| Laboratory Name                              |     |    |          |
| Date serology sent to a PHE lab              |     |    |          |

Communications to PHE should only be sent between PHE email addresses, directed to [respiratory.lead@phe.gov.uk](mailto:respiratory.lead@phe.gov.uk)

PHE strives to comply with all data protection legislation and confidentiality best practice in accordance with the Data Protection Act (2018) and the General Data Protection Regulation (GDPR). All data will be handled securely. At local level data shared electronically will be from secure nhs.net to nhs.net email accounts. Communications to PHE (between HPTs and authorised PHE National Infection service staff) will be between secure phe.gov.uk accounts. Data is held by PHE NIS in a secure web system hosted on encrypted NHS N3 network and access to this database is restricted to authorised scientific and medical staff.

Data collection is undertaken with permissions granted under Regulation 3 of The Health Service (Control of Patient Information) Regulations 2002, and without explicit patient permission under Section 251 of the NHS Act 2006 (<http://www.legislation.gov.uk/uksi/2002/1438/regulation/3/made>).
