# Supplementary material for: Transmission dynamics of COVID-19 in household and community settings in the United Kingdom, January to March 2020
Source: PubMed Central journal article supplement (PMC9012093; doi:10.2807/1560-7917.es.2022.27.15.2001551), 2022-04-14
Supplement: 20-01551_BERNAL_Supplement2_Questionnaire2.pdf [file 20-01551_BERNAL_Supplement2_Questionnaire2.pdf]

## Supplement 2

This supplementary material is hosted by *Eurosurveillance* as supporting information alongside the article [Transmission dynamics of COVID-19 in household and community settings in the United Kingdom, January to March 2020] on behalf of the authors who remain responsible for the accuracy and appropriateness of the content. The same standards for ethics, copyright, attributions and permissions as for the article apply. Supplements are not edited by *Eurosurveillance* and the journal is not responsible for the maintenance of any links or email addresses provided therein.

Contact Follow-up Form - 2b  
v6- COVID-19

| For reference only                                                                                                                                                              |         |                                                   |       |                                                             |
|---------------------------------------------------------------------------------------------------------------------------------------------------------------------------------|---------|---------------------------------------------------|-------|-------------------------------------------------------------|
| Confirmed case number (issued by National i.e NISHPZone)                                                                                                                        |         | Local ID of contact (local HPZone ID for contact) |       | FF100 id number (automatically generated on FF100 web tool) |
| Name of confirmed case                                                                                                                                                          |         |                                                   |       |                                                             |
| <p><b>*Mandatory fields in pink with bold text and an asterisk</b><br/>           Questions in italics only need to be updated if information has changed since the 2a form</p> |         |                                                   |       |                                                             |
| 1. Details of the Contact                                                                                                                                                       |         |                                                   |       |                                                             |
| NHS number                                                                                                                                                                      |         |                                                   |       |                                                             |
| <b>*Forename</b>                                                                                                                                                                |         |                                                   |       |                                                             |
| <b>*Surname</b>                                                                                                                                                                 |         |                                                   |       |                                                             |
| <b>*Date of birth</b>                                                                                                                                                           |         |                                                   |       |                                                             |
| 2. Reporter Details (if different to 2a)                                                                                                                                        |         |                                                   |       |                                                             |
| <b>*Name of the reporter (person completing the form)</b>                                                                                                                       |         |                                                   |       |                                                             |
| <b>*Date Reported</b>                                                                                                                                                           |         |                                                   |       |                                                             |
| Position                                                                                                                                                                        |         |                                                   |       |                                                             |
| Organisation                                                                                                                                                                    |         |                                                   |       |                                                             |
| Phone and extension                                                                                                                                                             |         |                                                   |       |                                                             |
| Mobile                                                                                                                                                                          |         |                                                   |       |                                                             |
| Email                                                                                                                                                                           |         |                                                   |       |                                                             |
| Fax                                                                                                                                                                             |         |                                                   |       |                                                             |
| <b>*Date of interview with informant</b>                                                                                                                                        |         |                                                   |       |                                                             |
| 3. Informant Details (if different to 2a)                                                                                                                                       |         |                                                   |       |                                                             |
| Informant (Please mark x)                                                                                                                                                       | Contact |                                                   | Other |                                                             |
| If Other:                                                                                                                                                                       |         |                                                   |       |                                                             |
| Contact details including telephone number                                                                                                                                      |         |                                                   |       |                                                             |
| Relationship with contact                                                                                                                                                       |         |                                                   |       |                                                             |

Contact Follow-up Form - 2b  
v6- COVID-19

4. Exposure Information (if different to 2a)

|                                                                                                                                                                                                                                                                                                                                                            |    |                           |    |    |    |
|------------------------------------------------------------------------------------------------------------------------------------------------------------------------------------------------------------------------------------------------------------------------------------------------------------------------------------------------------------|----|---------------------------|----|----|----|
| *Last date of contact with confirmed case (If still in contact put today's date)                                                                                                                                                                                                                                                                           |    | Contact has not ended (x) |    |    |    |
| Date of illness onset for confirmed case (if known)                                                                                                                                                                                                                                                                                                        |    |                           |    |    |    |
| If date of onset in confirmed case is known:<br>Please mark with x below all days of contact with the confirmed case since onset of illness in the confirmed case.<br>E.g. 0 means contact on the day of onset of illness. +1 means contact the day after onset of illness<br>If date of onset in confirmed case is not known please skip to next question |    |                           |    |    |    |
| Day                                                                                                                                                                                                                                                                                                                                                        | 0  | 1                         | 2  | 3  | 4  |
| Date (autocompletes from question above)                                                                                                                                                                                                                                                                                                                   |    |                           |    |    |    |
| Enter x for contact occurred on this day                                                                                                                                                                                                                                                                                                                   |    |                           |    |    |    |
| Day                                                                                                                                                                                                                                                                                                                                                        | 5  | 6                         | 7  | 8  | 9  |
| Date                                                                                                                                                                                                                                                                                                                                                       |    |                           |    |    |    |
| Enter x for contact occurred on this day                                                                                                                                                                                                                                                                                                                   |    |                           |    |    |    |
| Day                                                                                                                                                                                                                                                                                                                                                        | 10 | 11                        | 12 | 13 | 14 |
| Date                                                                                                                                                                                                                                                                                                                                                       |    |                           |    |    |    |
| Enter x for contact occurred on this day                                                                                                                                                                                                                                                                                                                   |    |                           |    |    |    |
| If date of onset in confirmed case is not known, please give the total number of days you were in contact with the confirmed case while they were symptomatic                                                                                                                                                                                              |    |                           |    |    |    |

Contact Follow-up Form - 2b  
v6- COVID-19

**4. Symptoms in this contact (final updated)**

|                                                                                                                                             |                            |                          |         |             |  |
|---------------------------------------------------------------------------------------------------------------------------------------------|----------------------------|--------------------------|---------|-------------|--|
| *Has the contact been ill within the 14 days after exposure to the confirmed case?<br>(see symptoms)                                        | Yes                        | No                       |         |             |  |
|                                                                                                                                             |                            |                          |         |             |  |
| *Is the contact currently ill?                                                                                                              | Yes                        | No                       |         |             |  |
|                                                                                                                                             |                            |                          |         |             |  |
| Did the contact have any additional symptoms not previously mentioned in form 2a and up to 14 days since last exposure with confirmed case? |                            |                          |         |             |  |
| If yes, date of first symptom onset                                                                                                         |                            |                          |         | Unknown (x) |  |
| If yes, time of onset                                                                                                                       | AM                         | PM                       | Unknown |             |  |
|                                                                                                                                             |                            |                          |         |             |  |
| If yes, maximum temperature (°C)                                                                                                            |                            |                          |         |             |  |
| <b>Respiratory symptoms</b>                                                                                                                 |                            |                          |         |             |  |
| Fever or history of Fever ( $\geq 38^{\circ}\text{C}$ )                                                                                     | Yes                        | If yes, first onset date | No      | Unknown     |  |
|                                                                                                                                             |                            |                          |         |             |  |
| Runny nose                                                                                                                                  | Yes                        | If yes, first onset date | No      | Unknown     |  |
|                                                                                                                                             |                            |                          |         |             |  |
| Sneezing                                                                                                                                    | Yes                        | If yes, first onset date | No      | Unknown     |  |
|                                                                                                                                             |                            |                          |         |             |  |
| Cough                                                                                                                                       | Yes                        | If yes, first onset date | No      | Unknown     |  |
|                                                                                                                                             |                            |                          |         |             |  |
|                                                                                                                                             | If yes, dry or productive? |                          | Dry     | Productive  |  |
|                                                                                                                                             |                            |                          |         |             |  |
| Shortness of breath                                                                                                                         | Yes                        | If yes, first onset date | No      | Unknown     |  |
|                                                                                                                                             |                            |                          |         |             |  |
| Sore throat                                                                                                                                 | Yes                        | If yes, first onset date | No      | Unknown     |  |
|                                                                                                                                             |                            |                          |         |             |  |

Contact Follow-up Form - 2b  
v6- COVID-19

| Other symptoms                      |     |                          |                |         |
|-------------------------------------|-----|--------------------------|----------------|---------|
| Diarrhoea                           | Yes | No                       | Unknown        |         |
|                                     |     |                          |                |         |
| Nausea                              | Yes | No                       | Unknown        |         |
|                                     |     |                          |                |         |
| Vomiting                            | Yes | No                       | Unknown        |         |
|                                     |     |                          |                |         |
| Fatigue                             | Yes | No                       | Unknown        |         |
|                                     |     |                          |                |         |
| Muscle ache                         | Yes | No                       | Unknown        |         |
|                                     |     |                          |                |         |
| Joint ache                          | Yes | No                       | Unknown        |         |
|                                     |     |                          |                |         |
| Loss of appetite                    | Yes | No                       | Unknown        |         |
|                                     |     |                          |                |         |
| Headache                            | Yes | No                       | Unknown        |         |
|                                     |     |                          |                |         |
| Seizures                            | Yes | No                       | Unknown        |         |
|                                     |     |                          |                |         |
| Altered Consciousness               | Yes | No                       | Unknown        |         |
|                                     |     |                          |                |         |
| Nose bleed                          | Yes | No                       | Unknown        |         |
|                                     |     |                          |                |         |
| Rash                                | Yes | No                       | Unknown        |         |
|                                     |     |                          |                |         |
| Other                               | Yes | No                       | Please specify |         |
|                                     |     |                          |                |         |
| Loss of sense of smell              | Yes | If yes, first onset date | No             | Unknown |
|                                     |     |                          |                |         |
| If yes has sense of smell returned? | Yes | If yes, first onset date | No             | Unknown |
|                                     |     |                          |                |         |

Contact Follow-up Form - 2b  
v6- COVID-19

**5. Outcome/Current Status of this contact**

Please complete only if has been ill since exposure or is currently ill.

|                                                                                                                                                   |                                                                    |                                                                            |            |            |                        |
|---------------------------------------------------------------------------------------------------------------------------------------------------|--------------------------------------------------------------------|----------------------------------------------------------------------------|------------|------------|------------------------|
| Status                                                                                                                                            | Recovered                                                          | If recovered.<br>Date symptoms resolved (able to resume normal activities) | ill        | Dead       | If dead, date of death |
|                                                                                                                                                   |                                                                    |                                                                            |            |            |                        |
| Was the case hospitalised?                                                                                                                        | Yes                                                                | No                                                                         | Don't know |            |                        |
|                                                                                                                                                   |                                                                    |                                                                            |            |            |                        |
| If hospitalisation occurred:                                                                                                                      | Is the contact still hospitalised?                                 | Yes                                                                        | No         | Don't know |                        |
|                                                                                                                                                   |                                                                    |                                                                            |            |            |                        |
|                                                                                                                                                   | If yes, date of admission                                          |                                                                            |            |            |                        |
|                                                                                                                                                   | Date of discharge (leave blank if patient is still hospitalised)   |                                                                            |            |            |                        |
| If Dead:<br><br>(n.b. If this information is not currently available, please leave blank and send through an update as soon as results are known) | Contribution of WN-CoV to death (mark x in one only)               | Underlying/primary                                                         |            |            |                        |
|                                                                                                                                                   |                                                                    | Contributing/secondary                                                     |            |            |                        |
|                                                                                                                                                   |                                                                    | No contribution to death                                                   |            |            |                        |
|                                                                                                                                                   |                                                                    | Unknown                                                                    |            |            |                        |
|                                                                                                                                                   | Was a post mortem performed?                                       | Yes                                                                        | No         | Don't know |                        |
|                                                                                                                                                   |                                                                    |                                                                            |            |            |                        |
|                                                                                                                                                   | Cause of death as MCCD (Medical Certificate of the cause of death) |                                                                            |            |            |                        |
| Result of coroner's report where applicable                                                                                                       |                                                                    |                                                                            |            |            |                        |

Contact Follow-up Form - 2b  
v6- COVID-19

| 6. Serology                                      |     |    |          |
|--------------------------------------------------|-----|----|----------|
| Has convalescent serology been taken on contact? | Yes | No | Not sure |
|                                                  |     |    |          |
| If yes, date serology taken?                     |     |    |          |
| Laboratory Name                                  |     |    |          |
| Date serology sent to a PHE lab                  |     |    |          |

7. Final contact classification

**\*MANDATORY: Please mark only one box in this section**

| If contact becomes a possible case:<br>(see below for definitions)                                | Confirmed                                                                                           | Presumptive positive                                                  | Possible                                                                          | Discarded                                                     |
|---------------------------------------------------------------------------------------------------|-----------------------------------------------------------------------------------------------------|-----------------------------------------------------------------------|-----------------------------------------------------------------------------------|---------------------------------------------------------------|
|                                                                                                   |                                                                                                     |                                                                       |                                                                                   |                                                               |
|                                                                                                   | PHE National Reference Laboratory (RVU) Colindale positive confirmation of infection with novel-CoV | PHE novel-CoV Testing Laboratory positive of infection with novel-CoV | Acute respiratory infection or more severe illness as per possible case algorithm | Any possible case with a negative novel CoV laboratory result |
| Asymptomatic contact: No illness                                                                  |                                                                                                     |                                                                       |                                                                                   |                                                               |
| Contact did not become ill during the 14 days after case exposure (protected/unprotected contact) |                                                                                                     |                                                                       |                                                                                   |                                                               |
| Lost to follow up                                                                                 |                                                                                                     |                                                                       |                                                                                   |                                                               |
| If the contact is lost (non-responsive) during the follow up period                               |                                                                                                     |                                                                       |                                                                                   |                                                               |

Communications to PHE should only be sent between PHE email addresses, directed to [respiratory.lead@phe.gov.uk](mailto:respiratory.lead@phe.gov.uk)

PHE strives to comply with all data protection legislation and confidentiality best practice in accordance with the Data Protection Act (2018) and the General Data Protection Regulation (GDPR). All data will be handled securely. At local level data shared electronically will be from secure nhs.net to nhs.net email accounts. Communications to PHE (between HPTs and authorised PHE National Infection service staff) will be between secure phe.gov.uk accounts. Data is held by PHE NIS in a secure web system hosted on encrypted NHS N3 network and access to this database is restricted to authorised scientific and medical staff.

Data collection is undertaken with permissions granted under Regulation 3 of The Health Service (Control of Patient Information) Regulations 2002, and without explicit patient permission under Section 251 of the NHS Act 2006 (<http://www.legislation.gov.uk/uksi/2002/1438/regulation/3/made>).
